# Supplementary material for: Identification of microRNAs associated with the aggressiveness of prolactin pituitary tumors using bioinformatic analysis
Source: PubMed Central journal article supplement — Oncol Rep. 2019 May 28;42(2):533–48. doi: 10.3892/or.2019.7173 (PMC6609352; doi:10.3892/or.2019.7173), 2019-05-28

Figure S1. Hierarchical clustering heat map of the DEMs between aggressive and nonaggressive prolactin pituitary tumors. Red, upregulation; blue, downregulation. DEMs, differentially expressed miRNAs.

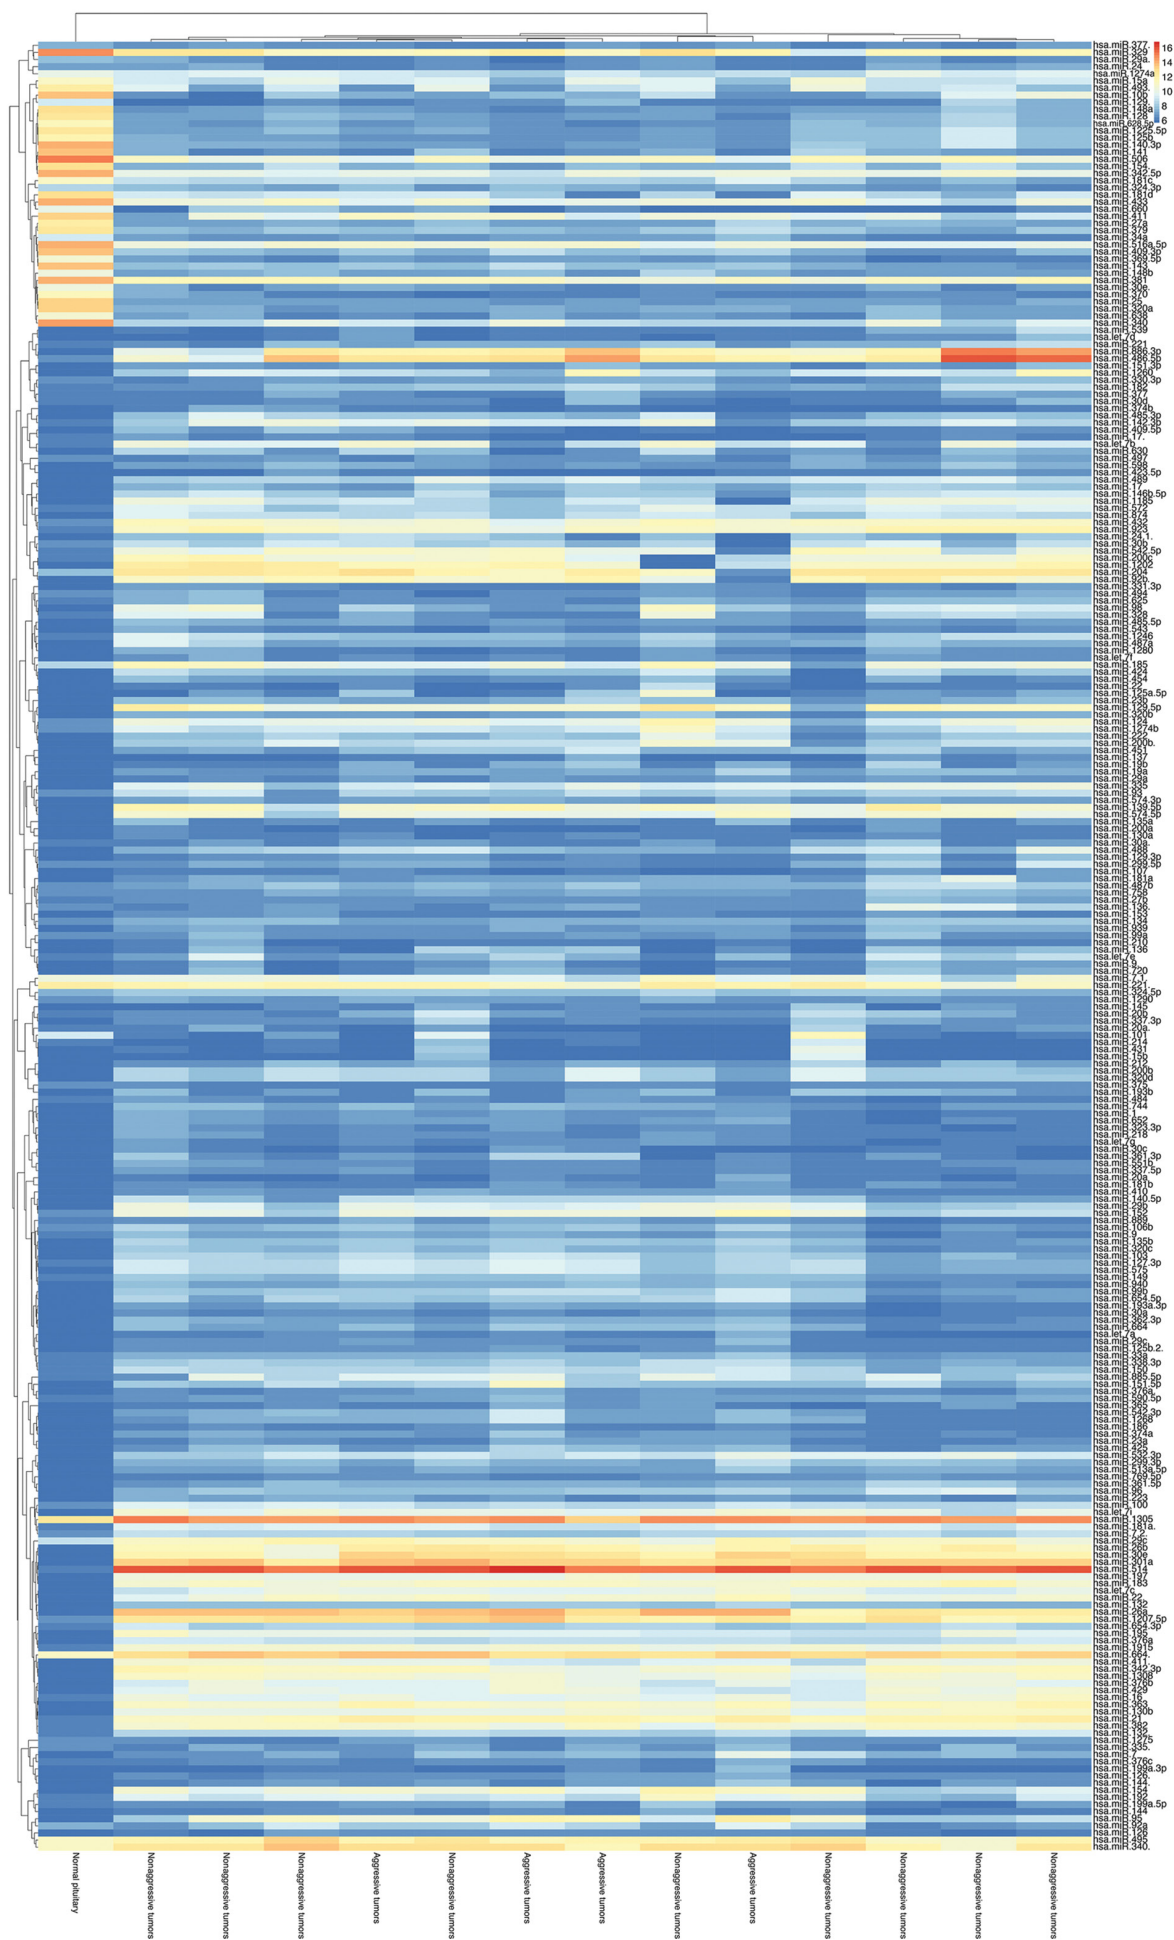

Supplement: Supplementary_Data.pdf [file Supplementary_Data.pdf]
